# Supplementary material
Source: publisher site journal article supplement (https://www.dovepress.com/article/335197)
Supplement: Supplementary file 1 [file get_supplementary_file.php]

**Supplemental Table A.** Species-specific prespecified threshold criteria.

| Group  [Threshold criteria] | Species |
| --- | --- |
| I [1 CFU/mL] | - *Streptococcus pyogenes* - *Streptococcus pneumoniae* - Gram-negative spp. (except *Moraxella catarrhalis*) |
| II [10 CFU/mL] | - *Staphylococcus aureus* - Streptococcusspp.(except *S. pyogenes* and *S. pneumoniae*) - *Moraxella catarrhalis* |
| III [100 CFU/mL] | - Staphylococcusspp.(except *S. aureus*) - Micrococcusspp. - Bacillusspp. |
| IV [1000 CFU/mL] | - Corynebacteriumspp. |

Reproduced from: DeCory HH, Sanfilippo CM, Proskin HM, Blondeau JM (2020) Characterization of baseline polybacterial versus monobacterial infections in three randomized controlled bacterial conjunctivitis trials and microbial outcomes with besifloxacin ophthalmic suspension 0.6%. PLoS ONE 15(8): e0237603; free for use and reproduction under a Creative Commons Attribution License.18

**Supplemental Table B.** Frequency of baseline pathogens in poly- and monobacterial conjunctivitis infections from pediatric subjects.

| Organism | Polybacterial  (No of isolates=405;  No of subjects=172) | | Monobacterial  (No of isolates=558;  No of subjects=558) | |
| --- | --- | --- | --- | --- |
| n | % isolates (*% subjects*) | n | % isolates/subjects |
| *Haemophilus influenzae* | 82 | 20.2 (*47.7)* | 270 | 48.4 |
| Streptococcus mitis group | 62 | 15.3 (*36.0*) | 21 | 3.8 |
| *Staphylococcus aureus* | 62 | 15.3 (*36.0*) | 50 | 9.0 |
| *Streptococcus pneumoniae* | 32 | 7.9 (*18.6*) | 157 | 28.1 |
| *Staphylococcus epidermidis* | 27 | 6.7 (*15.7*) | 17 | 3.0 |
| *Moraxella catarrhalis* | 20 | 4.9 (*11.6*) | 3 | 0.5 |
| *Dolosigranulum pigrum* | 9 | 2.2 (*5.2*) | 1 | 0.2 |
| *Streptococcus mitis* | 7 | 1.7 (*4.1*) | 3 | 0.5 |
| *Aerococcus viridans* | 6 | 1.5 (*3.5*) | 0 | - |
| *Streptococcus oralis* | 6 | 1.5 (*3.5*) | 1 | 0.2 |
| *Corynebacterium pseudodiphtheriticum* | 5 | 1.2 (*2.9*) | 0 | - |
| *Moraxella nonliquefaciens* | 5 | 1.2 (*2.9*) | 1 | 0.2 |
| *Streptococcus pyogenes* | 4 | 1.0 (*2.3*) | 0 | - |
| *Rothia mucilaginosa* | 4 | 1.0 (*2.3*) | 0 | - |
| Streptococcus species | 4 | 1.0 (*2.3*) | 2 | 0.4 |
| *Corynebacterium* *macginleyi* | 4 | 1.0 (*2.3*) | 2 | 0.4 |
| *Staphylococcus capitis* | 4 | 1.0 (*2.3*) | 1 | 0.2 |
| *Staphylococcus caprae* | 4 | 1.0 (*2.3*) | 1 | 0.2 |
| *Haemophilus parainfluenzae* | 3 | 0.7 (*1.7*) | 0 | - |
| *Neisseria subflava* | 3 | 0.7 (*1.7*) | 0 | - |
| *Corynebacterium propinquum* | 3 | 0.7 (*1.7*) | 1 | 0.2 |
| CDC Coryneform Group G | 3 | 0.7 (*1.7*) | 0 | - |
| Brevibacterium species | 3 | 0.7 (*1.7*) | 3 | 0.5 |
| *Staphylococcus hominis* | 3 | 0.7 (*1.7*) | 2 | 0.4 |
| Streptococcus salivarius group | 3 | 0.7 (*1.7*) | 1 | 0.2 |
| Coagulase negative staphylococci | 2 | 0.5 (*1.2*) | 0 | - |
| Corynebacterium species | 2 | 0.5 (*1.2*) | 2 | 0.4 |
| *Streptococcus salivarius* | 2 | 0.5 (*1.2*) | 0 | - |
| *Viridans streptococcus* | 2 | 0.5 (*1.2*) | 1 | 0.2 |
| *Acinetobacter calcoaceticus* | 1 | 0.2 (*0.6*) | - | - |
| *Acinetobacter calcoaceticus /Baumannii complex* | 1 | 0.2 (*0.6*) | - | - |
| *Acinetobacter radioresistens* | 1 | 0.2 (*0.6*) | - | - |
| Acinetobacter species | 1 | 0.2 (*0.6*) | - | - |
| Bacillus species | 1 | 0.2 (*0.6*) | - | - |
| CDC Coryneform Group I1 | 1 | 0.2 (*0.6*) | - | - |
| *Corynebacterium afermentans* | 1 | 0.2 (*0.6*) | - | - |
| *Corynebacterium argentoratense* | 1 | 0.2 (*0.6*) | - | - |
| *Corynebacterium bovis* | 1 | 0.2 (*0.6*) | - | - |
| *Corynebacterium pseudotuberculosis* | 1 | 0.2 (*0.6*) | - | - |
| *Corynebacterium striatum* | 1 | 0.2 (*0.6*) | - | - |
| *Enterococcus faecalis* | 1 | 0.2 (*0.6*) | 1 | 0.2 |
| Gemella species | 1 | 0.2 (*0.6*) | - | - |
| *Granulicatella adiacens* | 1 | 0.2 (*0.6*) | 1 | 0.2 |
| *Kingella denitrificans* | 1 | 0.2 (*0.6*) | - | - |
| *Kocuria kristinae* | 1 | 0.2 (*0.6*) | 1 | 0.2 |
| *Micrococcus luteus* | 1 | 0.2 (*0.6*) | - | - |
| Micrococcus species | 1 | 0.2 (*0.6*) | - | - |
| *Morganella morganii* | 1 | 0.2 (*0.6*) | - | - |
| *Neisseria mucosa* | 1 | 0.2 (*0.6*) | - | - |
| *Neisseria sicca* | 1 | 0.2 (*0.6*) | - | - |
| Non-fermentative gram-negative rod | 1 | 0.2 (*0.6*) | - | - |
| *Paracoccus yeei* | 1 | 0.2 (*0.6*) | - | - |
| Rothia species | 1 | 0.2 (*0.6*) | - | - |
| *Staphylococcus pasteuri* | 1 | 0.2 (*0.6*) | - | - |
| *Staphylococcus sciuri* | 1 | 0.2 (*0.6*) | - | - |
| *Staphylococcus warneri* | 1 | 0.2 (*0.6*) | - | - |
| Streptococcus milleri group | 1 | 0.2 (*0.6*) | - | - |
| *Streptococcus sanguinis* | 1 | 0.2 (*0.6*) | - | - |
| Leminorella species | - | - | 1 | 0.2 |
| Pantoea species | - | - | 1 | 0.2 |
| *Pseudomonas aeruginosa* | - | - | 1 | 0.2 |
| *Klebsiella oxytoca* | - | - | 1 | 0.2 |
| *Moraxella lacunata* | - | - | 7 | 1.3 |
| *Corynebacterium jeikeium* | - | - | 1 | 0.2 |
| *Staphylococcus lugdunensis* | - | - | 1 | 0.2 |
| *Streptococcus dysgalactiae* | - | - | 1 | 0.2 |
| *Streptococcus parasanguinis* | - | - | 1 | 0.2 |
